# Supplementary material
Source: MDPI journal article supplement (https://www.mdpi.com/2076-3263/10/10/400)
Supplement: s1 [file s1]

## Sheet: Nandasena 2011
	Nandasena et al. (2011) model					1
																		Orientation A: boulder a axis is NORMAL to the flow direction									Orientation B: boulder a axis is PARALLEL to the flow direction
	Constants:				Boulder attributes													Case 1: Sliding		Case 2: Overturning/rolling		Case 3: Saltating		Case 4: Joint-bounded/lifting			Case 1 (Sliding)		Case 2 (overturning/rolling)		Case 3 (saltating)		Case 4 (joint-bounded/lifting)
	Density of sea water, ρw:	1024	(kg/m3)		ID	Easting (deg.)	Northing (deg.)	Lithology	Gradient (deg.)	Elevation (m asl)	Distance to platform edge (m)	Block density ρ (kg/m3)	Box volume (m3)	a-axis length (m)	b-axis length (m)	c-axis length (m)		Min. Vel. (m/s)	Min. Height (m)	Min. Vel. (m/s)	Min. Height (m)	Min. Vel. (m/s)	Min. Height (m)	Min. Vel. (m/s)	Min. Height (m)		min V (m/s)	min h (m)	min V (m/s)	min h (m)	min V (m/s)	min h (m)	min V (m/s)	min h (m)
	Acceleration due to gravity, g:	9.81	(m/s2)		RM1	14.5715	35.8703	Lower Globigerina Limestone	2	3.53	30	1900	22.8	7.6	3	1		3.99	0.3	6.56	0.81	9.71	1.78	9.83	1.83		5.69	0.61	8.92	1.51	9.71	1.78	9.83	1.83
	Lift coefficient, Cl:	0.178			RM2	14.5713	35.8709	Lower Globigerina Limestone	8	4.37	10	1900	33.792	6.6	3.2	1.6		4.51	0.38	6.54	0.81	12.22	2.83	12.81	3.11		6.12	0.71	9.69	1.78	12.22	2.83	12.81	3.11
	Drag coefficient, Cd:	1.95			RM3	14.574	35.8682	Lower Globigerina Limestone	10	3.54	25	1900	55.25	8.5	6.5	1		5.84	0.65	8.7	1.43	9.64	1.76	10.21	1.98		6.4	0.77	9.07	1.56	9.64	1.76	10.21	1.98
	Coefficient of static friction, μ:	0.7			RM4	14.5743	35.8677	Lower Globigerina Limestone	9	5.88	27	1900	7.567	4.7	2.3	0.7		3.72	0.26	5.82	0.64	8.07	1.23	8.51	1.37		4.9	0.45	7.33	1.02	8.07	1.23	8.51	1.37
	Froude Number, Fr:	2.32			RM5	14.5737	35.8682	Lower Globigerina Limestone	9	5.43	27	1900	5.04	3.6	2	0.7		3.51	0.23	5.42	0.56	8.07	1.23	8.51	1.37		4.45	0.37	6.89	0.9	8.07	1.23	8.51	1.37
					RM6	14.5729	35.869	Lower Globigerina Limestone	10	4.4	31	1900	6.993	3.7	2.1	0.9		3.68	0.26	5.46	0.57	9.14	1.58	9.69	1.78		4.67	0.41	7.27	1	9.14	1.58	9.69	1.78
	Instructions:				RM7	14.5731	35.869	Lower Globigerina Limestone	4	2.6	16	1900	7.5	5	1.5	1		3.01	0.17	4.1	0.32	9.7	1.78	9.93	1.87		5.01	0.47	8.14	1.26	9.7	1.78	9.93	1.87
	1. Update constants in col. C				RM8	14.5731	35.869	Lower Globigerina Limestone	4	3	19	1900	3.366	3.4	1.1	0.9		2.6	0.13	3.28	0.2	9.2	1.6	9.42	1.68		4.26	0.34	6.98	0.92	9.2	1.6	9.42	1.68
	2. Enter boulder attribute data in cols. F-Q				RM9	14.5731	35.869	Lower Globigerina Limestone	4	3.3	20	1900	7.6	3.8	2.5	0.8		3.71	0.26	6.02	0.69	8.67	1.43	8.88	1.49		4.39	0.36	7.17	0.97	8.67	1.43	8.88	1.49
	3. Run the model by clicking the button below				RM10	14.5731	35.869	Lower Globigerina Limestone	4	3.2	20	1900	2.04	2	1.7	0.6		3.08	0.18	4.95	0.46	7.51	1.07	7.69	1.12		3.3	0.21	5.39	0.55	7.51	1.07	7.69	1.12
	4. Results are output to cols. S-AI				RM11	14.5731	35.869	Lower Globigerina Limestone	4	3.6	22	1900	6.084	3.9	1.3	1.2		2.84	0.15	3.41	0.22	10.62	2.14	10.88	2.24		4.62	0.4	7.52	1.07	10.62	2.14	10.88	2.24
					RM12	14.573	35.869	Lower Globigerina Limestone	4	3.8	24	1900	2.312	3.4	1.7	0.4		2.97	0.17	4.88	0.45	6.13	0.71	6.28	0.75		3.82	0.28	5.74	0.62	6.13	0.71	6.28	0.75
					RM13	14.5731	35.869	Lower Globigerina Limestone	4	2.88	18	1900	1.8	1.5	1.5	0.8		2.98	0.17	4.35	0.36	8.67	1.43	8.88	1.49		2.98	0.17	4.35	0.36	8.67	1.43	8.88	1.49
					IM1	14.5743	35.8676	Lower Globigerina Limestone	4	6.55	54	1900	14.04	5.2	3	0.9		4.04	0.31	6.6	0.82	9.2	1.6	9.42	1.68		5.01	0.48	8.03	1.22	9.2	1.6	9.42	1.68
					IM2	14.5743	35.8677	Lower Globigerina Limestone	4	6.15	43	1900	7.92	3.3	3	0.8		4	0.3	6.56	0.82	8.67	1.43	8.88	1.49		4.16	0.33	6.82	0.88	8.67	1.43	8.88	1.49
					IM3	14.573	35.8687	Lower Globigerina Limestone	4	6.95	53	1900	3.23	3.4	1.9	0.5		3.18	0.19	5.22	0.52	6.86	0.89	7.02	0.93		3.96	0.3	6.2	0.73	6.86	0.89	7.02	0.93
					IM4	14.5732	35.8691	Lower Globigerina Limestone	13	3.73	11	1900	54.516	6.6	5.9	1.4		6.02	0.69	9.16	1.59	11.34	2.44	12.22	2.83		6.29	0.75	9.51	1.71	11.34	2.44	12.22	2.83
					IM5	14.5724	35.8691	Lower Globigerina Limestone	11	7.74	20	1900	6.44	3.5	2.3	0.8		3.83	0.28	5.83	0.64	8.61	1.4	9.17	1.59		4.55	0.39	7.01	0.93	8.61	1.4	9.17	1.59
					IM6	14.5713	35.8711	Lower Globigerina Limestone	1	2.9	17	1900	62.31	6.7	6.2	1.5		5.5	0.57	9.3	1.64	11.89	2.68	11.96	2.71		5.67	0.61	9.57	1.74	11.89	2.68	11.96	2.71
					IM7	14.5712	35.8712	Lower Globigerina Limestone	10	3.4	19	1900	30	5	4	1.5		5.04	0.48	7.65	1.11	11.8	2.64	12.51	2.96		5.53	0.58	8.59	1.4	11.8	2.64	12.51	2.96
					IM8	14.5709	35.8717	Lower Globigerina Limestone	16	4.93	38	1900	12.6	5	2.8	0.9		4.37	0.36	6.46	0.79	9.03	1.54	9.9	1.86		5.49	0.57	7.96	1.2	9.03	1.54	9.9	1.86
					IM9	14.5709	35.8718	Lower Globigerina Limestone	12	3.61	41	1900	9.072	4.2	2.4	0.9		3.97	0.3	5.94	0.67	9.11	1.57	9.77	1.81		4.99	0.47	7.6	1.09	9.11	1.57	9.77	1.81
					IM10	14.5708	35.8719	Lower Globigerina Limestone	11	5.45	30	1900	9.9	3.6	2.5	1.1		4.06	0.31	5.95	0.67	10.09	1.93	10.76	2.19		4.74	0.43	7.3	1.01	10.09	1.93	10.76	2.19
					IM11	14.5709	35.872	Lower Globigerina Limestone	5	2.61	32	1900	17.22	4.2	4.1	1		4.68	0.42	7.62	1.1	9.69	1.78	9.98	1.89		4.73	0.42	7.69	1.12	9.69	1.78	9.98	1.89
					IM12	14.5702	35.8727	Lower Globigerina Limestone	6	2.34	28	1900	10.416	4.2	3.1	0.8		4.14	0.32	6.67	0.84	8.66	1.42	8.97	1.53		4.66	0.41	7.4	1.04	8.66	1.42	8.97	1.53
					IM13	14.5697	35.8728	Lower Globigerina Limestone	14	7.18	47	1900	1.76	2.2	1.6	0.5		3.25	0.2	4.88	0.45	6.76	0.87	7.33	1.02		3.69	0.26	5.56	0.58	6.76	0.87	7.33	1.02
					IM14	14.5701	35.8728	Lower Globigerina Limestone	6	3.58	22	1900	9.801	3.3	2.7	1.1		4.01	0.3	6.18	0.72	10.16	1.95	10.52	2.1		4.37	0.36	6.94	0.91	10.16	1.95	10.52	2.1
					IM15	14.5696	35.8729	Lower Globigerina Limestone	1	5.88	46	1900	5.175	4.5	2.3	0.5		3.31	0.21	5.58	0.59	6.87	0.89	6.91	0.9		4.2	0.33	6.45	0.79	6.87	0.89	6.91	0.9
					IM16	14.5695	35.873	Lower Globigerina Limestone	12	6.59	45	1900	2	2	2	0.5		3.5	0.23	5.37	0.55	6.79	0.87	7.28	1		3.5	0.23	5.37	0.55	6.79	0.87	7.28	1
					IM17	14.5693	35.8731	Lower Globigerina Limestone	12	6.92	41	1900	1.92	2.4	1	0.8		2.67	0.13	3.28	0.2	8.59	1.4	9.21	1.61		3.93	0.29	5.97	0.67	8.59	1.4	9.21	1.61
					IM18	14.5695	35.8731	Lower Globigerina Limestone	10	6.04	37	1900	14.4	4	3	1.2		4.38	0.36	6.58	0.82	10.56	2.11	11.19	2.37		4.95	0.46	7.69	1.12	10.56	2.11	11.19	2.37
					IM19	14.5695	35.8732	Lower Globigerina Limestone	3	4.08	15	1900	8.68	4	3.1	0.7		3.95	0.3	6.54	0.81	8.12	1.25	8.27	1.29		4.35	0.36	7.06	0.94	8.12	1.25	8.27	1.29
					IM20	14.5688	35.8735	Lower Globigerina Limestone	12	6.28	52	1900	1.65	2.5	1.1	0.6		2.75	0.14	3.81	0.27	7.44	1.05	7.97	1.2		3.89	0.29	5.97	0.68	7.44	1.05	7.97	1.2
					IM21	14.5687	35.8736	Lower Globigerina Limestone	9	7.12	50	1900	3.6	3	2	0.6		3.47	0.23	5.43	0.56	7.48	1.06	7.88	1.18		4.07	0.31	6.33	0.76	7.48	1.06	7.88	1.18
					IM22	14.5687	35.8736	Lower Globigerina Limestone	9	5.97	55	1900	2.808	2.7	1.3	0.8		2.93	0.16	3.99	0.3	8.63	1.41	9.1	1.57		4.03	0.31	6.31	0.75	8.63	1.41	9.1	1.57
					IM23	14.5687	35.8736	Lower Globigerina Limestone	5	6.78	53	1900	2.106	2.7	1.3	0.6		2.78	0.15	4.19	0.33	7.51	1.07	7.73	1.13		3.76	0.27	6.11	0.71	7.51	1.07	7.73	1.13
					IM24	14.5685	35.8739	Lower Globigerina Limestone	17	6.75	37	1900	4.032	2.8	2.4	0.6		3.98	0.3	5.88	0.65	7.36	1.02	8.1	1.24		4.23	0.34	6.19	0.73	7.36	1.02	8.1	1.24
					IM25	14.5685	35.8739	Lower Globigerina Limestone	17	6.75	39	1900	10.494	5.3	3.3	0.6		4.5	0.38	6.48	0.79	7.36	1.02	8.1	1.24		5.3	0.53	7.01	0.93	7.36	1.02	8.1	1.24
					IM26	14.5684	35.8741	Lower Globigerina Limestone	19	6.48	30	1900	12.47	4.3	2.9	1		4.56	0.39	6.58	0.82	9.44	1.69	10.52	2.1		5.35	0.54	7.78	1.15	9.44	1.69	10.52	2.1
					IM27	14.5681	35.8744	Lower Globigerina Limestone	0	4.76	14	1900	7.168	3.2	2.8	0.8		3.71	0.26	6.31	0.75	8.69	1.43	8.69	1.43		3.92	0.29	6.69	0.85	8.69	1.43	8.69	1.43
					IM28	14.5677	35.8747	Lower Globigerina Limestone	0	6.28	41	1900	2.31	2.2	2.1	0.5		3.16	0.19	5.39	0.55	6.87	0.89	6.87	0.89		3.22	0.2	5.49	0.57	6.87	0.89	6.87	0.89
					AM1	14.5722	35.8695	Lower Globigerina Limestone	8	6.5	11	1900	31.248	6.2	2.8	1.8		4.27	0.35	5.76	0.63	12.96	3.18	13.59	3.5		6.03	0.69	9.54	1.72	12.96	3.18	13.59	3.5
					AM2	14.5711	35.871	Lower Globigerina Limestone	11	4.7	28	1900	11.352	4.3	2.2	1.2		3.86	0.28	5.37	0.55	10.54	2.1	11.23	2.39		5.14	0.5	7.95	1.2	10.54	2.1	11.23	2.39
					AM3	14.5719	35.8689	Lower Globigerina Limestone	6	11.73	79	1900	0.896	1.6	0.8	0.7		2.27	0.1	2.76	0.14	8.1	1.24	8.39	1.33		3.1	0.18	4.71	0.42	8.1	1.24	8.39	1.33
					AM4	14.5705	35.8716	Lower Globigerina Limestone	2	9.18	82	1900	0.455	1.3	0.7	0.5		2.02	0.08	2.71	0.14	6.86	0.89	6.95	0.91		2.65	0.13	4.27	0.35	6.86	0.89	6.95	0.91
					AM5	14.5705	35.8719	Lower Globigerina Limestone	1	8.01	73	1900	0.252	1.2	0.7	0.3		1.94	0.07	3.08	0.18	5.32	0.54	5.35	0.54		2.43	0.11	4.11	0.32	5.32	0.54	5.35	0.54
					AM6	14.5681	35.8735	Lower Globigerina Limestone	6	10.91	92	1900	0.576	1.2	1.2	0.4		2.63	0.13	4.18	0.33	6.12	0.71	6.35	0.76		2.63	0.13	4.18	0.33	6.12	0.71	6.35	0.76
					AM7	14.5681	35.8736	Lower Globigerina Limestone	6	11.33	88	1900	0.336	1.4	0.6	0.4		1.94	0.07	2.62	0.13	6.12	0.71	6.35	0.76		2.81	0.15	4.52	0.39	6.12	0.71	6.35	0.76
					AM8	14.568	35.8737	Lower Globigerina Limestone	6	11.35	85	1900	0.294	1.4	0.7	0.3		2.05	0.08	3.12	0.18	5.3	0.53	5.5	0.57		2.73	0.14	4.37	0.36	5.3	0.53	5.5	0.57
					AM9	14.5679	35.8738	Lower Globigerina Limestone	6	11.64	84	1900	0.448	1.4	0.8	0.4		2.21	0.09	3.25	0.2	6.12	0.71	6.35	0.76		2.81	0.15	4.52	0.39	6.12	0.71	6.35	0.76
					AM10	14.5679	35.8738	Lower Globigerina Limestone	6	11.97	87	1900	0.684	1.9	0.9	0.4		2.33	0.1	3.52	0.24	6.12	0.71	6.35	0.76		3.17	0.19	5.08	0.49	6.12	0.71	6.35	0.76
					AM11	14.567	35.8751	Lower Globigerina Limestone	7	9.61	51	1900	0.63	1.5	0.7	0.6		2.14	0.09	2.62	0.13	7.49	1.06	7.81	1.15		3.02	0.17	4.63	0.41	7.49	1.06	7.81	1.15
					AM12	14.5669	35.8751	Lower Globigerina Limestone	6	10.02	54	1900	0.264	2.2	0.4	0.3		1.59	0.05	2.06	0.08	5.3	0.53	5.5	0.57		3.21	0.2	4.87	0.45	5.3	0.53	5.5	0.57
					AM13	14.5665	35.8754	Lower Globigerina Limestone	5	9.8	50	1900	1.056	1.6	1.1	0.6		2.58	0.13	3.72	0.26	7.51	1.07	7.73	1.13		3.04	0.17	4.79	0.43	7.51	1.07	7.73	1.13
					AM14	14.5661	35.8757	Lower Globigerina Limestone	7	11.15	47	1900	0.42	1.2	0.7	0.5		2.13	0.09	2.78	0.15	6.84	0.89	7.13	0.96		2.7	0.14	4.12	0.32	6.84	0.89	7.13	0.96
					AM15	14.5661	35.8757	Lower Globigerina Limestone	4	10.96	40	1900	1.44	1.6	1	0.9		2.48	0.12	3.02	0.17	9.2	1.6	9.42	1.68		3.08	0.18	4.44	0.37	9.2	1.6	9.42	1.68
					AM16	14.5663	35.8757	Lower Globigerina Limestone	5	8.71	33	1900	1.265	2.3	1.1	0.5		2.55	0.12	3.87	0.28	6.85	0.89	7.06	0.94		3.46	0.23	5.62	0.6	6.85	0.89	7.06	0.94
					AM17	14.566	35.8758	Lower Globigerina Limestone	6	10.8	24	1900	0.45	1	0.9	0.5		2.36	0.11	3.37	0.21	6.85	0.89	7.09	0.95		2.47	0.12	3.63	0.25	6.85	0.89	7.09	0.95
					AM18	14.5653	35.8765	Lower Globigerina Limestone	4	9.8	65	1900	0.576	1.8	0.8	0.4		2.17	0.09	3.23	0.2	6.13	0.71	6.28	0.75		3.04	0.18	4.98	0.47	6.13	0.71	6.28	0.75
					AM19	14.5653	35.8765	Lower Globigerina Limestone	4	9.8	65	1900	0.72	1.5	0.8	0.6		2.21	0.09	2.88	0.16	7.51	1.07	7.69	1.12		2.92	0.16	4.59	0.4	7.51	1.07	7.69	1.12
					AM20	14.5653	35.8766	Lower Globigerina Limestone	4	10.06	66	1900	0.936	2.6	0.9	0.4		2.28	0.1	3.5	0.23	6.13	0.71	6.28	0.75		3.48	0.23	5.5	0.57	6.13	0.71	6.28	0.75
					AM21	14.5653	35.8766	Lower Globigerina Limestone	4	10.06	67	1900	0.42	1.5	0.7	0.4		2.04	0.08	2.92	0.16	6.13	0.71	6.28	0.75		2.83	0.15	4.64	0.41	6.13	0.71	6.28	0.75
					AM22	14.5653	35.8766	Lower Globigerina Limestone	4	10.06	65	1900	0.561	1.7	1.1	0.3		2.43	0.11	3.98	0.3	5.31	0.53	5.44	0.56		2.87	0.16	4.62	0.4	5.31	0.53	5.44	0.56

## Sheet: Hansom 2008
	Hansom et al. (2008) model
																							Orientation A: boulder a axis is NORMAL to the flow direction							Orientation B: boulder a axis is PARALLEL to the flow direction
	Constants:				Boulder attributes													2D drag coeff Cd		Drag correction for 3D flow			Case 1: Sliding		Case 2: Overturning against small obstacle		Case 3: Overturning against large obstacle			Case 1: Sliding		Case 2: Overturning against small obstacle		Case 3: Overturning against large obstacle
	Density sea water, ρw:	1024	(kg/m3)		ID	Easting (deg.)	Northing (deg.)	Lithology	Gradient (deg.)	Elevation (m asl)	Distance to platform edge (m)	Block density ρ (kg/m3)	Box volume (m3)	a-axis length (m)	b-axis length (m)	c-axis length (m)		Cd (for orientation A)	Cd (for orientation B)	ae (for orientation A )	be (for orientation B)		Min. Vel. (m/s)	Min. Height (m)	Min. Vel. (m/s)	Min. Height (m)	Min. Vel. (m/s)	Min. Height (m)		Min. Vel. (m/s)	Min. Height (m)	Min. Vel. (m/s)	Min. Height (m)	Min. Vel. (m/s)	Min. Height (m)
	Acceleration due to gravity, g:	9.81	(m/s2)		AM1	14.5722	35.8695	Lower Globigerina Limestone		6.5	11	1900	31.248	6.2	2.8	1.8		2.33	1.69	4.8	2.1		3.95	0.4	5.11	0.66	-	-		6.62	1.12	9.38	2.24	13.24	4.47
	Lift coefficient, C1:	0.1			AM2	14.5711	35.871	Lower Globigerina Limestone		3.7	16	1900	11.352	4.3	2.2	1.2		2.25	1.65	3.2	1.65		3.61	0.33	4.86	0.6	18.97	9.17		5.56	0.79	7.85	1.57	10.79	2.97
	Additional lift coefficient, C2:	0.8
	Coefficient of static friction, μ:	0.7
	Froude Number, Fr:	2
	Options:
	Interpolation of Cd values:	1	(1=linear, 2=semi-log)
	Instructions:
	1. Update constants in col C
	2. Enter boulder size data in cols F-K
	3. Run the model by clicking the button below

## Sheet: Runup model
	Modifed Cox and Machemehl (1986) model
	Constants:				Wave inundation
	Acceleration due to gravity (g):	9.81	(m/s2)		Distance from break point (m)	Wave velocity at boulder (m/s)
	Average slope of platform ramp (α):	10	(degrees)		0	16.6964
	Wave period (T):	10	(secs)		1	16.2488
	Wave height at breaking (Ho):	7.7	(m)		2	15.8011
					3	15.3535
	Calibration:				4	14.9058
	Horizontal distance from platform edge to calibration point (Xc):	10	(m)		5	14.4582
	Velocity at Xc (Vc):	12.22	(m/s)		6	14.0106
					7	13.5629
					8	13.1153
					9	12.6676
					10	12.22
	Froude Number from calibration (Fr):	1.8469			11	11.7724
					12	11.3247
	Plotting wave inundation:				13	10.8771
	Max distance to model the wave inundation	100	(m)		14	10.4294
	Plotting frequency for wave indundation	1	(m)		15	9.9818
	Dimensionless y-axis (0=no, 1=yes):	0	V/Vc?		16	9.5342
					17	9.0865
	wave velocity decay line:				18	8.6389
	gradient:	-0.44764			19	8.1912
	Velocity at X=0:	16.6964			20	7.7436
	X at V=0:	37.2987			21	7.296
					22	6.8483
					23	6.4007
					24	5.953
					25	5.5054
					26	5.0578
					27	4.6101
					28	4.1625
					29	3.7148
					30	3.2672
					31	2.8196
					32	2.3719
					33	1.9243
					34	1.4766
					35	1.029
					36	0.5814
					37	0.1337
					38	0
					39	0
					40	0
					41	0
					42	0
					43	0
					44	0
					45	0
					46	0
					47	0
					48	0
					49	0
					50	0
					51	0
					52	0
					53	0
					54	0
					55	0
					56	0
					57	0
					58	0
					59	0
					60	0
					61	0
					62	0
					63	0
					64	0
					65	0
					66	0
					67	0
					68	0
					69	0
					70	0
					71	0
					72	0
					73	0
					74	0
					75	0
					76	0
					77	0
					78	0
					79	0
					80	0
					81	0
					82	0
					83	0
					84	0
					85	0
					86	0
					87	0
					88	0
					89	0
					90	0
					91	0
					92	0
					93	0
					94	0
					95	0
					96	0
					97	0
					98	0
					99	0
					100	0
